# Supplementary material for: Computing the 7Li NMR chemical shielding of hydrated Li+ using cluster calculations and time-averaged configurations from ab initio molecular dynamics simulations
Source: Royal Society of Chemistry journal article supplement (doi:10.1039/c1cp20967a), 2011-01-01
Supplement: c1cp20967a.pdf [file c1cp20967a.pdf]

## Supplemental Material

### Computing the $^7\text{Li}$ NMR Chemical Shielding of Hydrated $\text{Li}^+$ Using Cluster Calculations and Time-Averaged Configurations from *Ab Initio* Molecular Dynamic Simulations

Todd M. Alam, David Hart and Susan L. B. Rempe

**Table S1:** Predicted  $^7\text{Li}$  NMR chemical shielding ( $\sigma$ ) as a function of theory level and basis set.

| Theory/Basis Set         | $\text{Li}^+$<br>$\sigma$ (ppm) | $\text{Li}^+(\text{H}_2\text{O})_4$<br>$\sigma$ (ppm) | $\text{Li}^+(\text{H}_2\text{O})_4$<br>$\Delta\sigma^{\text{Li}}$ (ppm) |
|--------------------------|---------------------------------|-------------------------------------------------------|-------------------------------------------------------------------------|
| HF/3-21G*                | 94.6                            | 92.3                                                  | +2.3                                                                    |
| HF/6-31G(d)              | 95.4                            | 93.0                                                  | +2.4                                                                    |
| HF/6-311(d)              | 95.4                            | 93.2                                                  | +2.2                                                                    |
| HF/6-311(2d,2p)          | 95.4                            | 92.8                                                  | +2.6                                                                    |
| HF/6-311++(2d,2p)        | 95.4                            | 92.8                                                  | +2.6                                                                    |
| HF/6-311++(2df,2p)       | 95.4                            | 92.8                                                  | +2.6                                                                    |
| HF/Aug-CC-pVTZ           | 95.4                            | 92.5                                                  | +2.9                                                                    |
|                          |                                 |                                                       |                                                                         |
|                          |                                 |                                                       |                                                                         |
|                          |                                 |                                                       |                                                                         |
| B3LYP/3-21G*             | 94.3                            | 91.2                                                  | +3.1                                                                    |
| B3LYP/6-31G(d)           | 95.1                            | 91.4                                                  | +3.7                                                                    |
| B3LYP/6-311(d)           | 95.3                            | 92.1                                                  | +3.2                                                                    |
| B3LYP/6-311(2d,2p)       | 95.3                            | 91.4                                                  | +3.9                                                                    |
| B3LYP/6-311++(2d,2p)     | 95.3                            | 91.3                                                  | +4.0                                                                    |
| B3LYP/6-311++(2df,2p)    | 95.3                            | 91.3                                                  | +4.0                                                                    |
| B3LYP/Aug-CC-pVTZ        | 95.2                            | 90.6                                                  | +4.6                                                                    |
|                          |                                 |                                                       |                                                                         |
| MP2/6-311++(2df,2p)      | 95.3                            | 92.8                                                  | +2.5                                                                    |
|                          |                                 |                                                       |                                                                         |
| B3PW91/6-311++(2df,2p)   | 95.3                            | 91.5                                                  | +3.8                                                                    |
| MPW1PW91/6-311++(2df,2p) | 95.4                            | 91.7                                                  | +3.7                                                                    |
|                          |                                 |                                                       |                                                                         |

$$\Delta\sigma^{\text{Li}} = \sigma(\text{Li}^+) - \sigma(\text{cluster})$$

B3LYP = Beck's three-parameter hybrid exchange functional and Lee, and Yang and Parr correlation functional.

B3PW91 = Beck's three-parameter hybrid exchange functional and Lee, and Perdew-Wang 1991 correlation functional.

MPW1PW91 = Modified Perdew-Wang exchange functional, and Perdew-Wang 1991 correlation functional.

## Empirical Variation of the Li NMR Shielding

Previous arguments had suggested that the NMR shielding could be described by the relationship,

$$\sigma_{\text{iso}}(^{6,7}\text{Li}) = \sigma_0 - C \left[ \sum_i \frac{W_i}{r_i^3} \right] \quad (\text{S1})$$

This does not appear to describe the Li-O bond variation that we have predicted for the  $\text{Li}^+(\text{H}_2\text{O})_n$  ( $n = 1-5$ ) clusters. Instead we propose the following modified relationship that allows for a different scaling factor  $f_i^N$  for a given coordination number  $N$ ,

$$\sigma_{\text{iso}}(^{6,7}\text{Li}) = \sigma_0 + \left[ \sum_i^N \frac{f_i^N W_i}{r_i^3} \right] \approx \sigma_0 + \frac{N f^N W}{r^3} \quad (\text{S2})$$

For this relationship it has been assumed that the bond valence  $W^i$  is constant (all waters in this case). For these small hydrated clusters, the Li-O bond distances are essentially the same for a given coordination number. The coefficients for this linear fit to the predicted variation shown in Figure S1 are given in Table S2. It is important to note that  $f^N$  changes with coordination number ( $N$ ), and is the reason the original relationship in Eq. S1 did not hold. This may suggest that bond valence  $W$  varies with coordination, and that changes in the effective charge of the Li may play a role in the observed shielding. This will be pursued in detail in future research efforts.

**Table S2:** Empirical fit of the  $^7\text{Li}$  NMR chemical shielding ( $\sigma$ ) as a function of Li-O bond length in gas optimized clusters. <sup>a,b</sup>

| Complex                             | N | $Nf^N W$<br>(ppm/Å) | $f^N W$<br>(ppm/Å) | $\sigma_0$<br>(ppm) | R       |
|-------------------------------------|---|---------------------|--------------------|---------------------|---------|
| $\text{Li}^+(\text{H}_2\text{O})$   | 1 | -19.77              | -19.77             | 96.135              | 0.99971 |
| $\text{Li}^+(\text{H}_2\text{O})_2$ | 2 | -29.99              | -14.99             | 96.286              | 0.99999 |
| $\text{Li}^+(\text{H}_2\text{O})_3$ | 3 | -34.37              | -11.46             | 96.208              | 0.99997 |
| $\text{Li}^+(\text{H}_2\text{O})_4$ | 4 | -35.55              | -8.89              | 96.078              | 0.99865 |
| $\text{Li}^+(\text{H}_2\text{O})_5$ | 5 | -37.53              | -7.51              | 96.295              | 0.99898 |

<sup>a</sup> NMR shielding of cluster calculated in the gas phase.

<sup>b</sup> Fits to Eqn. S2.

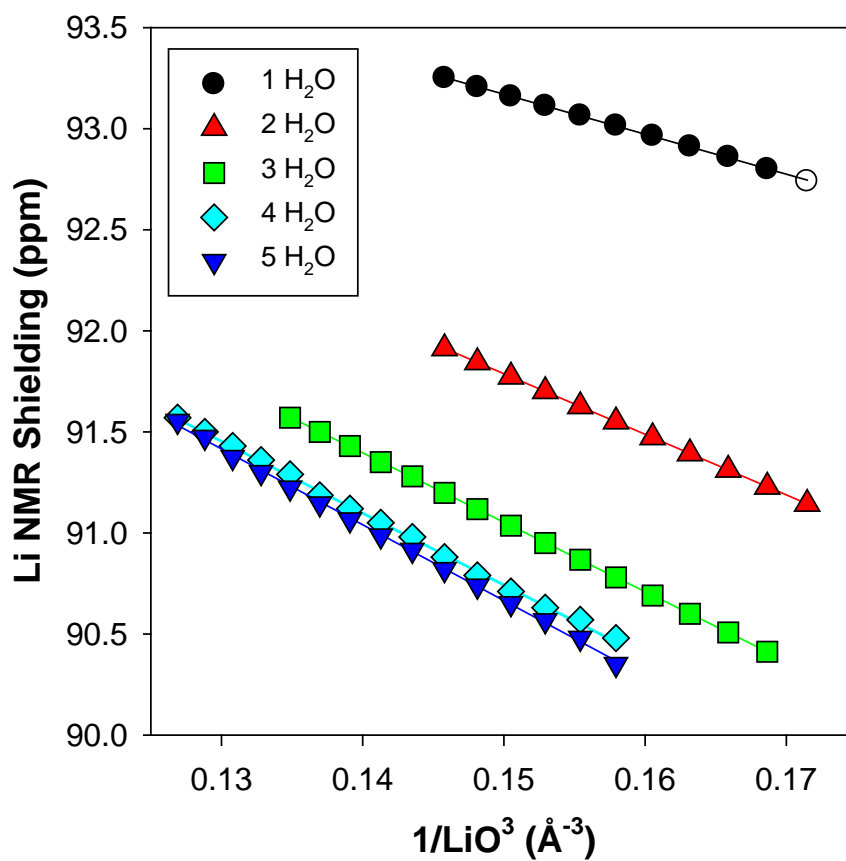

**Figure S1:** Variation of the predicted Li NMR chemical shielding for the  $\text{Li}^+(\text{H}_2\text{O})_n$  clusters as a function of inverse bond distance cubed,  $(\text{Li}-\text{O})^{-3}$ .

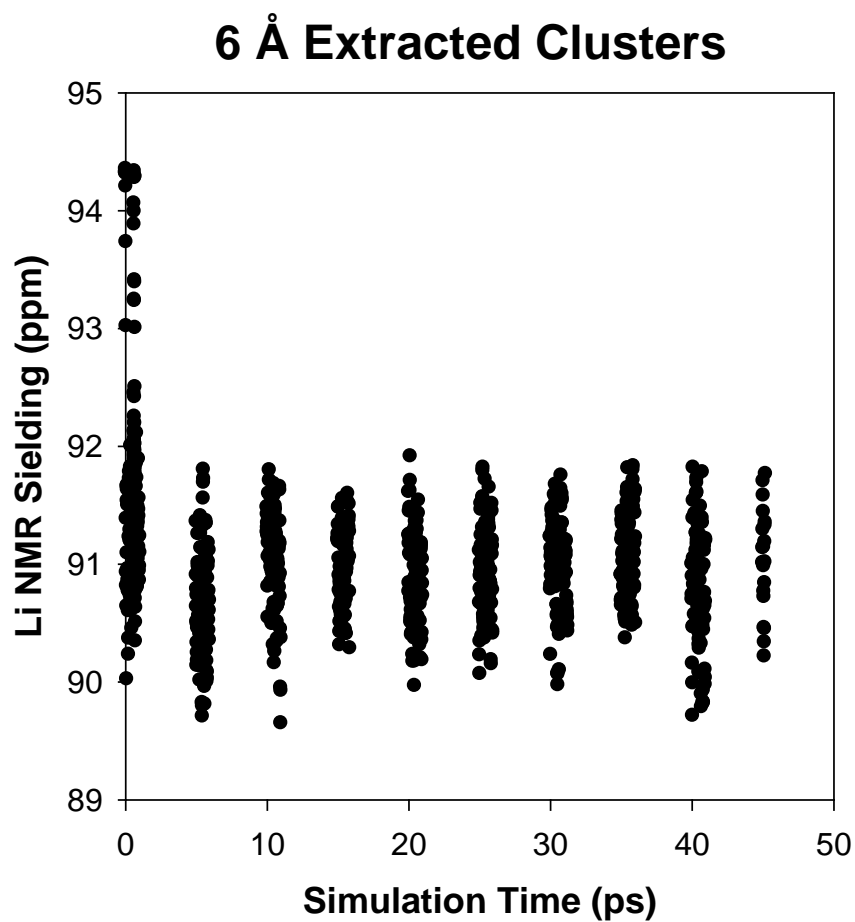

Figure S2: The Li NMR Chemical shielding for all clusters extracted assuming a Li-O cut-off distance of 6 Å. 1 ps regions were analyzed for every 5 ps intervals during the simulation. Note the initial 1 ps results have a high degree of dispersion due to the system not being equilibrated.
